# Supplementary material
Source: PubMed Central journal article supplement (PMC3807257)
Supplement: NIHMS521073-supplement-Fig_S1-S3.pdf [file NIHMS521073-supplement-Fig_S1-S3.pdf]

## Supplemental Information:

### Mitochondrial Genetic Background Modulates Bioenergetics and Susceptibility to Acute Cardiac Volume – Overload (Fetterman et al)

#### Figure Legends:

**Figure S1: Generation of Mitochondrial Nuclear eXchange (MNX) Mice.** (A) MNX mice were produced by enucleating fertilized oocytes from C57BL/6 (C57<sup>n</sup>:C57<sup>mt</sup> or C57) and C3H/HeN (C3H<sup>n</sup>:C3H<sup>mt</sup> or C3H) mice and the C3H nucleus transferred to enucleated C57 oocytes yielding C3H<sup>n</sup>:C57<sup>mt</sup> oocytes, which were implanted into surrogate females to generate MNX progeny. The reciprocal process was followed to generate the C57<sup>n</sup>:C3H<sup>mt</sup> MNX. MNX nomenclature is indicated by strain nuclear (strain<sup>n</sup>):strain mtDNA (strain<sup>mt</sup>), e.g. mice with C3H nuclear DNA and C57 mtDNA are indicated by C3H<sup>n</sup>:C57<sup>mt</sup>. Nuclear genotyping and mtDNA haplotyping of all originating founding females and F1 progeny was determined by nuclear SNP analysis of a panel of 38 distinguishing nuclear SNPs and complete sequencing of the mtDNA. (B) MNX mice; coat color segregates with the nuclear genome (C3H-brown, C57-black), whereas mtDNA haplotype verified by restriction enzyme length polymorphism analysis using *AspI* and *BclI* to confirm mitochondrial haplotype (C-D). (C) PCR products from C57 mtDNAs are cleaved by *AspI* to yield 274 bp and 111 bp fragments whereas C3H mtDNAs remain uncut (385 bp). (D) PCR products from C57 mtDNAs remain uncut (204 bp) whereas C3H mtDNAs are cleaved by *BclI* to yield 166 bp and 38 bp fragments. (E) *AspI* (upper panel) and *BclI* (lower panel) digest products of PCR products generated from genomic DNA isolated from heart tissues. Numbered lanes correspond to C57<sup>n</sup>:C57<sup>mt</sup> (1,2), C3H<sup>n</sup>:C57<sup>mt</sup> (3-5), C3H<sup>n</sup>:C3H<sup>mt</sup> (6,7) and C57<sup>n</sup>:C3H<sup>mt</sup> (8-10) mice, respectively.

**Figure S2: Complex I (NADH dehydrogenase) protein levels and activity in C57 and C3H mitochondria.** (A) Blue native 2D protein gels of complex I from isolated cardiac mitochondria. Molecular weight in kilodaltons is indicated on the left and spot number is indicated on the right. (B) Quantification of complex I subunits indicating no differences in the expression of isolated subunits. (C) Complex I activity measured in isolated heart mitochondria from C57 and C3H animals.

**Figure S3: Complex II (Succinate dehydrogenase) activity in heart mitochondria.** Complex II activity measured in isolated heart mitochondria from control (C57<sup>n</sup>:C57<sup>mt</sup> and C3H<sup>n</sup>:C3H<sup>mt</sup>) and MNX (C57<sup>n</sup>:C3H<sup>mt</sup> and C3H<sup>n</sup>:C57<sup>mt</sup>) mice. The nuclear genome for each group is indicated on the X-axis, whereas the filled or open bars indicate the presence of either the C57 mtDNA or C3H mtDNA, respectively.

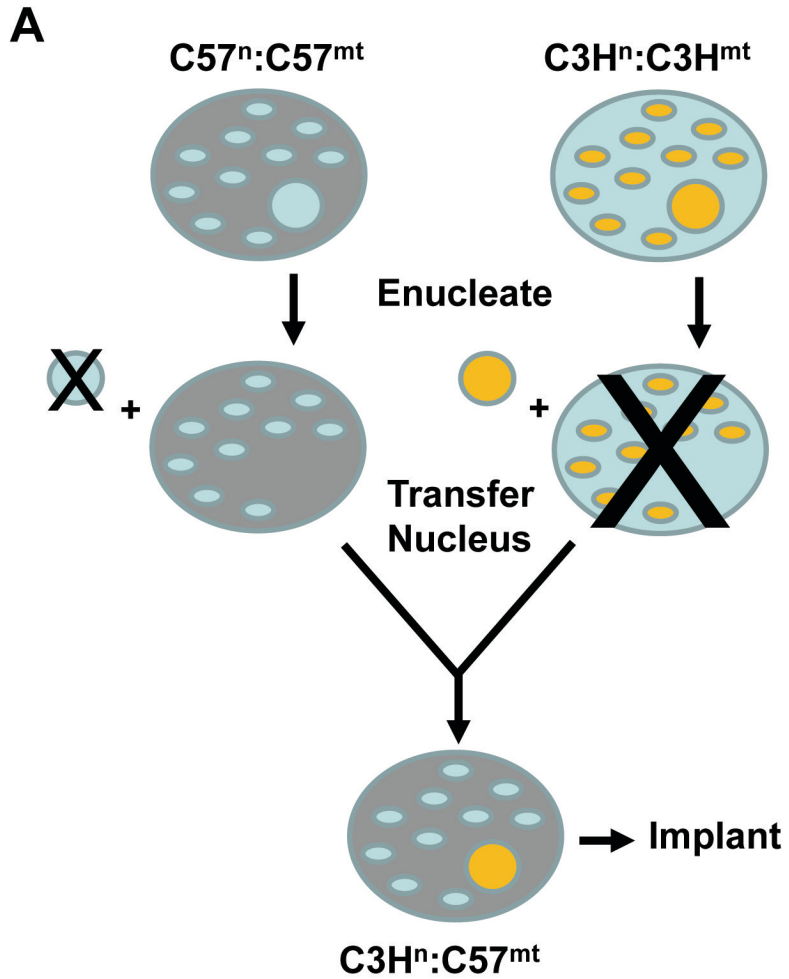

**B**

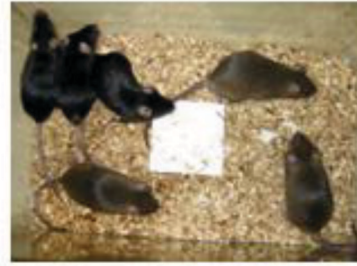

**C**

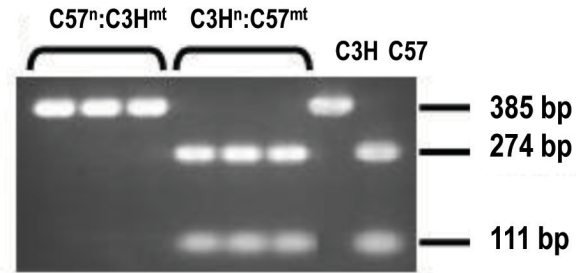

**D**

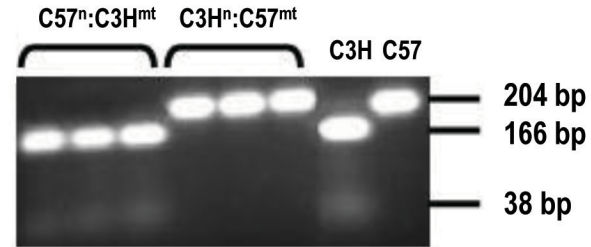

**E**

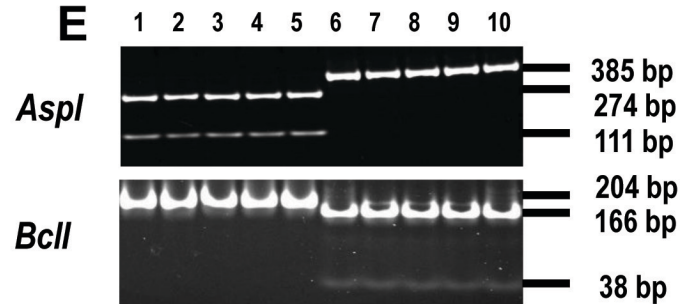

**A**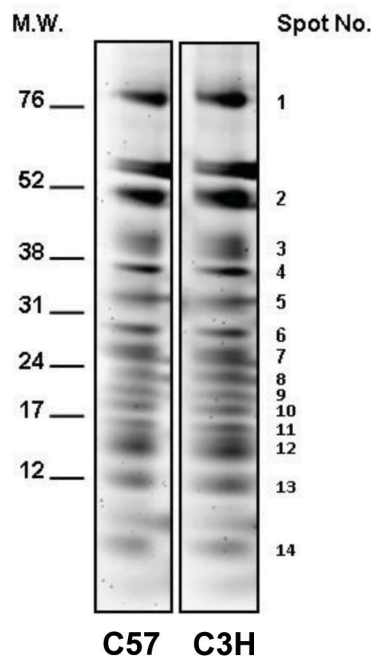**B**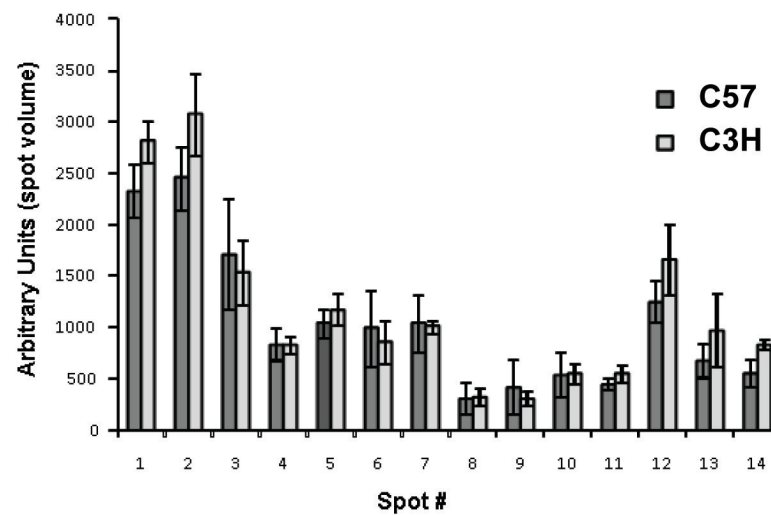**C**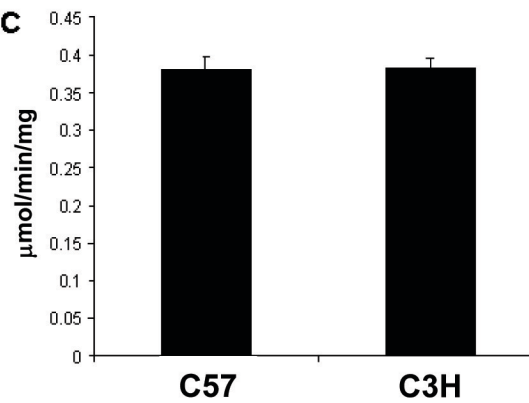

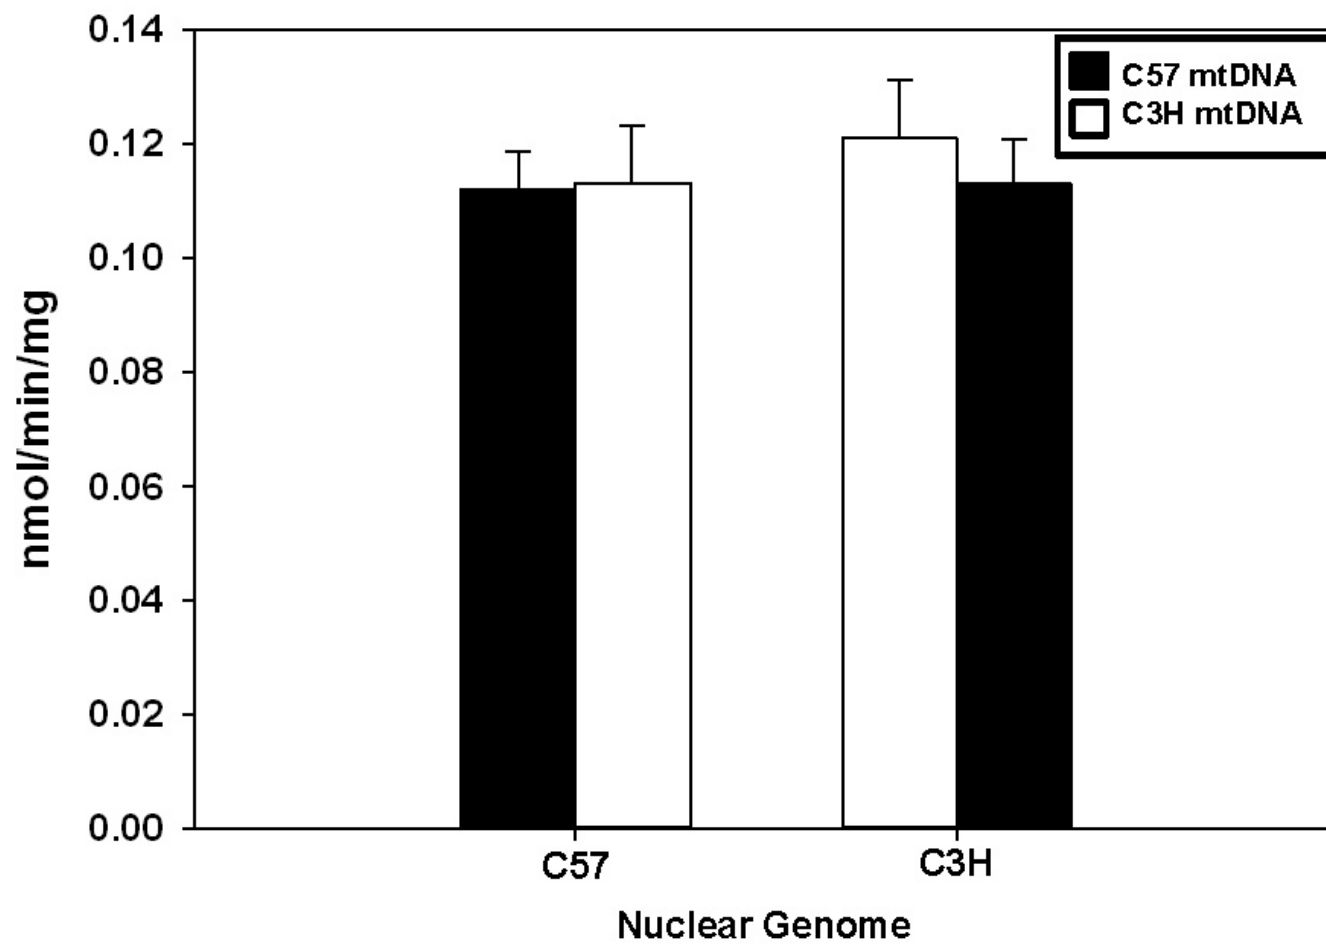

**Table S1: Analysis of 38 distinguishing Nuclear SNPs in control and MNX founder females.**

| Nuclear SNP    | Expected SNP |     | Control |     | C57 <sup>n</sup> :C3H <sup>mt</sup> |       |       | C3H <sup>n</sup> :C57 <sup>mt</sup> |       |       |
|----------------|--------------|-----|---------|-----|-------------------------------------|-------|-------|-------------------------------------|-------|-------|
|                | C57          | C3H | C57     | C3H | MNX 1                               | MNX 2 | MNX 3 | MNX 4                               | MNX 5 | MNX 6 |
| 01-004147733-M | A            | T   | A       | T   | A                                   | A     | A     | T                                   | T     | T     |
| 01-187052090-M | C            | A   | C       | A   | C                                   | C     | C     | A                                   | A     | A     |
| 02-047368792-G | T            | C   | T       | C   | T                                   | T     | T     | C                                   | C     | C     |
| 02-162979695-M | G            | A   | G       | A   | G                                   | G     | G     | A                                   | A     | A     |
| 03-007561998-N | T            | C   | T       | C   | T                                   | T     | T     | C                                   | C     | C     |
| 03-157197990-M | G            | A   | G       | A   | G                                   | G     | G     | A                                   | A     | A     |
| 04-004044733-M | C            | T   | C       | T   | C                                   | C     | C     | T                                   | T     | T     |
| 04-137216461-M | T            | C   | T       | C   | T                                   | T     | T     | C                                   | C     | C     |
| 05-013136419-M | C            | T   | C       | T   | C                                   | C     | C     | T                                   | T     | T     |
| 05-147904991-M | C            | A   | C       | A   | C                                   | C     | C     | A                                   | A     | A     |
| 06-012968430-M | A            | G   | A       | G   | A                                   | A     | A     | G                                   | G     | G     |
| 06-146820927-N | G            | A   | G       | A   | G                                   | G     | G     | A                                   | A     | A     |
| 07-004201219-N | A            | G   | A       | G   | A                                   | A     | A     | G                                   | G     | G     |
| 07-135345950-N | A            | G   | A       | G   | A                                   | A     | A     | G                                   | G     | G     |
| 08-076188935-M | A            | T   | A       | T   | A                                   | A     | A     | T                                   | T     | T     |
| 08-126038064-N | C            | G   | C       | G   | C                                   | C     | C     | G                                   | G     | G     |
| 09-063923771-M | G            | A   | G       | A   | G                                   | G     | G     | A                                   | A     | A     |
| 09-123708875-M | G            | A   | G       | A   | G                                   | G     | G     | A                                   | A     | A     |
| 10-012713073-N | T            | C   | T       | C   | T                                   | T     | T     | C                                   | C     | C     |
| 10-100345477-M | T            | C   | T       | C   | T                                   | T     | T     | C                                   | C     | C     |
| 11-033040833-M | T            | C   | T       | C   | T                                   | T     | T     | C                                   | C     | C     |
| 11-095327574-N | G            | T   | G       | T   | G                                   | G     | G     | T                                   | T     | T     |
| 12-005458738-M | T            | C   | T       | C   | T                                   | T     | T     | C                                   | C     | C     |
| 12-071296001-M | G            | A   | G       | A   | G                                   | G     | G     | A                                   | A     | A     |
| 13-032546453-N | G            | A   | G       | A   | G                                   | G     | G     | A                                   | A     | A     |
| 13-110101560-N | G            | T   | G       | T   | G                                   | G     | G     | T                                   | T     | T     |
| 14-022368155-G | T            | C   | T       | C   | T                                   | T     | T     | C                                   | C     | C     |
| 14-112544301-N | A            | G   | A       | G   | A                                   | A     | A     | G                                   | G     | G     |
| 15-005994001-M | A            | C   | A       | C   | A                                   | A     | A     | C                                   | C     | C     |
| 15-103221933-M | C            | G   | C       | G   | C                                   | C     | C     | G                                   | G     | G     |
| 16-012752727-C | A            | G   | A       | G   | A                                   | A     | A     | G                                   | G     | G     |
| 16-093066825-C | T            | C   | T       | C   | T                                   | T     | T     | C                                   | C     | C     |
| 17-011173324-G | G            | C   | G       | C   | G                                   | G     | G     | C                                   | C     | C     |
| 17-093441700-M | T            | C   | T       | C   | T                                   | T     | T     | C                                   | C     | C     |
| 18-006845916-M | G            | A   | G       | A   | G                                   | G     | G     | A                                   | A     | A     |
| 18-086980249-M | G            | A   | G       | A   | G                                   | G     | G     | A                                   | A     | A     |
| 19-007376322-N | T            | C   | T       | C   | T                                   | T     | T     | C                                   | C     | C     |
| 19-059089086-M | G            | A   | G       | A   | G                                   | G     | G     | A                                   | A     | A     |

**Table S2: Left ventricle function in 3 day ACF**

|                               | <b>C57<sup>n</sup>:C57<sup>mt</sup></b> |                | <b>C57<sup>n</sup>:C3H<sup>mt</sup></b> |                | <b>C3H<sup>n</sup>:C3H<sup>mt</sup></b> |                | <b>C3H<sup>n</sup>:C57<sup>mt</sup></b> |                |
|-------------------------------|-----------------------------------------|----------------|-----------------------------------------|----------------|-----------------------------------------|----------------|-----------------------------------------|----------------|
| <b>Treatment (n)</b>          | <b>Sham (5)</b>                         | <b>ACF (5)</b> | <b>Sham (4)</b>                         | <b>ACF (4)</b> | <b>Sham (5)</b>                         | <b>ACF (5)</b> | <b>Sham (3)</b>                         | <b>ACF (5)</b> |
| <b>HR (bpm)</b>               | 523 ± 21                                | 549 ± 22       | 469 ± 44                                | 536 ± 46       | 523 ± 23                                | 491 ± 13       | 544 ± 19                                | 516 ± 20       |
| <b>MAP (mm Hg)</b>            | 77 ± 1                                  | 64 ± 5*        | 79 ± 1                                  | 59 ± 2*        | 87 ± 2                                  | 73 ± 5*        | 80 ± 6                                  | 65 ± 5*        |
| <b>LVEDP (mm Hg)</b>          | 2 ± 0                                   | 7 ± 2*         | 4 ± 1                                   | 4 ± 1          | 3 ± 2                                   | 10 ± 2*        | 2 ± 1                                   | 9 ± 2*         |
| <b>LVEDD (mm)</b>             | 4 ± 0.1                                 | 4.4 ± 0.1*     | 3.7 ± 0.2                               | 4.1 ± 0.2      | 3.9 ± 0.06                              | 4.1 ± 0.04     | 3.7 ± 0.08                              | 4 ± 0.2        |
| <b>LV FS (%)</b>              | 25 ± 3                                  | 34 ± 5*        | 35 ± 2                                  | 45 ± 3*        | 31 ± 2                                  | 33 ± 3         | 28 ± 1                                  | 30 ± 1         |
| * = P < 0.05 vs. Matched Sham |                                         |                |                                         |                |                                         |                |                                         |                |

HR – heart rate

MAP – mean arterial pressure

LVEDP – left ventricular end diastolic pressure

LVEDD – left ventricular end diastolic dimension

LV FS – left ventricular fractional shortening
